# Supplementary material
Source: PubMed Central journal article supplement (PMC6090541)
Supplement: NIHMS1500121-supplement-2.pdf [file NIHMS1500121-supplement-2.pdf]

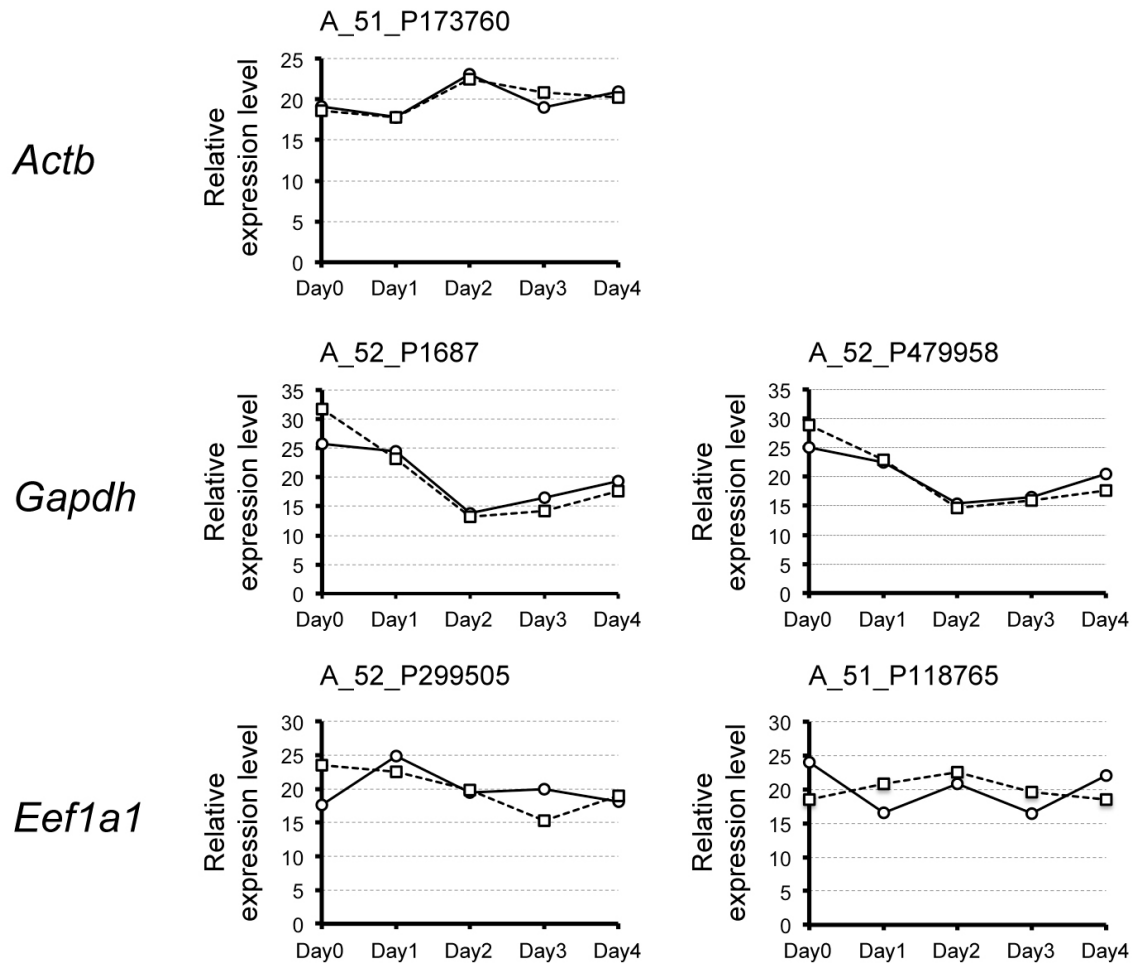

**Figure S1.** Microarray data showing temporal expression profiles of commonly used housekeeping genes in P19C5 embryoid bodies (EBs). Solid and dashed lines represent two independent biological replicates. Probe ID of the Whole Mouse Genome Microarray (G4122F; Agilent Technologies, Santa Clara, CA) is shown above each graph. cDNA synthesis, labeling, hybridization, detection, and analysis were performed with the assistance of the Genomics Core Facility at the John A. Burns School of Medicine of the University of Hawaii, as described previously (Marikawa, Y., Tamashiro, D.A.A., Fujita, T.C., Alarcon, V.B. 2011. Dual Roles of Oct4 in the maintenance of mouse P19 embryonal carcinoma cells: as negative regulator of Wnt/ $\beta$ -catenin signaling and competence provider for Brachyury expression. *Stem Cells Dev.* 20, 621-633.) Data for all gene probes were exported to Microsoft Excel sheet (Supplementary Excel file).
